# Supplementary material for: Factors Affecting the Retention of Indigenous Australians in the Health Workforce: A Systematic Review
Source: MDPI journal article supplement (doi:10.3390/ijerph15050914), 2018-05-04
Supplement: s1 [file s1]

# Factors Affecting the Retention of Indigenous Australians in the Health Workforce: A Systematic Review

## Search Strategies

### Search Strategies for Peer-reviewed Studies

#### Database: PubMed

Search Date: 10 August 2017

|    |                                                                                                                                                                                                                                                                                                                                                                                                                                                               |
|----|---------------------------------------------------------------------------------------------------------------------------------------------------------------------------------------------------------------------------------------------------------------------------------------------------------------------------------------------------------------------------------------------------------------------------------------------------------------|
| 1  | oceanic ancestry group[mh] OR american native continental ancestry group[mh]                                                                                                                                                                                                                                                                                                                                                                                  |
| 2  | indigenous OR indigene* OR aborigin* OR "torres strait islander" OR "torres strait islanders" OR maori* OR polynesian* OR "pacific peoples" OR "native american" OR "native americans" OR "american indian" OR "american indians" OR amerind* OR alaskan* OR eskimo* OR "native hawaiian" OR "native hawaiians" OR "first nation" OR "first nations" OR inuit* OR metis OR "native canadian" OR "native canadians" OR "canadian indian" OR "canadian Indians" |
| 3  | 1 or 2                                                                                                                                                                                                                                                                                                                                                                                                                                                        |
| 4  | Employment[mh] OR Health Personnel[mh] OR workplace[mh]                                                                                                                                                                                                                                                                                                                                                                                                       |
| 5  | Worker* OR workforce OR staff OR personnel OR "healthcare providers" OR "Health Care Providers" OR "healthcare workers" OR "health care workers" OR "health workers"                                                                                                                                                                                                                                                                                          |
| 6  | 4 or 5                                                                                                                                                                                                                                                                                                                                                                                                                                                        |
| 7  | Personnel turnover[mh]                                                                                                                                                                                                                                                                                                                                                                                                                                        |
| 8  | Remain OR retain OR retention OR turnover OR barrier* OR enabler* OR facilitator*                                                                                                                                                                                                                                                                                                                                                                             |
| 9  | 7 or 8                                                                                                                                                                                                                                                                                                                                                                                                                                                        |
| 10 | 3 and 6 and 9                                                                                                                                                                                                                                                                                                                                                                                                                                                 |

#### Database: CINAHL Plus

Interface: EBSCOhost

Search Date: 10 August 2017

|   |                                                                                                                                                                                                                                                                                                                                                                                                                                                               |
|---|---------------------------------------------------------------------------------------------------------------------------------------------------------------------------------------------------------------------------------------------------------------------------------------------------------------------------------------------------------------------------------------------------------------------------------------------------------------|
| 1 | MH "Indigenous Peoples+"                                                                                                                                                                                                                                                                                                                                                                                                                                      |
| 2 | indigenous OR indigene* OR aborigin* OR "torres strait islander" OR "torres strait islanders" OR maori* OR polynesian* OR "pacific peoples" OR "native american" OR "native americans" OR "american indian" OR "american indians" OR amerind* OR alaskan* OR eskimo* OR "native hawaiian" OR "native hawaiians" OR "first nation" OR "first nations" OR inuit* OR metis OR "native canadian" OR "native canadians" OR "canadian indian" OR "canadian Indians" |
| 3 | 1 or 2                                                                                                                                                                                                                                                                                                                                                                                                                                                        |
| 4 | "Workforce" OR MH "Health Personnel+"                                                                                                                                                                                                                                                                                                                                                                                                                         |

|    |                                                                                                                                                                      |
|----|----------------------------------------------------------------------------------------------------------------------------------------------------------------------|
| 5  | Worker* OR workforce OR staff OR personnel OR "healthcare providers" OR "Health Care Providers" OR "healthcare workers" OR "health care workers" OR "health workers" |
| 6  | 4 or 5                                                                                                                                                               |
| 7  | MH "Personnel Turnover" OR MH "Personnel Retention"                                                                                                                  |
| 8  | Remain OR retain OR retention OR turnover OR barrier* OR enabler* OR facilitator*                                                                                    |
| 9  | 7 or 8                                                                                                                                                               |
| 10 | 3 and 6 and 9                                                                                                                                                        |

**Database: Informit Indigenous Collection**

Search Date: 16 August 2017

|   |                                                                                                                                                                      |
|---|----------------------------------------------------------------------------------------------------------------------------------------------------------------------|
| 1 | Worker* OR workforce OR staff OR personnel OR "healthcare providers" OR "Health Care Providers" OR "healthcare workers" OR "health care workers" OR "health workers" |
| 2 | Remain OR retain OR retention OR turnover OR barrier* OR enabler* OR facilitator*                                                                                    |
| 3 | 1 and 2                                                                                                                                                              |

**Database: Informit Health Collection**

Search Date: 16 August 2017

|   |                                                                                                                                                                      |
|---|----------------------------------------------------------------------------------------------------------------------------------------------------------------------|
| 1 | indigenous OR indigene* OR aborigin* OR "torres strait islander" OR "torres strait islanders"                                                                        |
| 2 | Worker* OR workforce OR staff OR personnel OR "healthcare providers" OR "Health Care Providers" OR "healthcare workers" OR "health care workers" OR "health workers" |
| 3 | Remain OR retain OR retention OR turnover OR barrier* OR enabler* OR facilitator*                                                                                    |
| 4 | 1 and 2 and 3                                                                                                                                                        |

## Search Strategies for Grey Literature

### **Source: Health Organisation Websites**

Where possible, websites were searched using relevant search terms such as 'retention', 'retain' and 'health workforce'.

Where a search interface did not exist, relevant publications were identified by scanning the list of publications and reports for each organisation and reviewing titles and summaries.

| <b>Health Organisation Website</b>                                                 | <b>Dates Searched</b>               | <b>Publications Identified</b> |
|------------------------------------------------------------------------------------|-------------------------------------|--------------------------------|
| Australian Indigenous Doctors Association (AIDA)                                   | 1 September 2017                    | 0                              |
| Australian Institute of Health and Welfare (AIHW)                                  | 10 August 2017                      | 1                              |
| Congress of Aboriginal and Torres Strait Islander Nurses and Midwives (CATSINaM)   | 1 September 2017                    | 1                              |
| HealthInfoNet                                                                      | 10 August 2017                      | 1                              |
| Health Workforce Australia (HWA)                                                   | 10 August 2017                      | 5                              |
| Indigenous Allied Health Australia (IAHA)                                          | 1 September 2017                    | 0                              |
| LIME (Leaders in Indigenous Medical Education) Resource Hub                        | 31 August 2017,<br>1 September 2017 | 15                             |
| National Aboriginal and Torres Strait Islander Health Worker Association (NATSIWA) | 1 September 2017                    | 0                              |

### **Source: HealthInfoNet Endnote database**

Searched using combinations of the following keywords – "Aboriginal" or "Indigenous" and "worker" or "workforce" on titles. This identified 23 publications.
